# Supplementary material
Source: PubMed Central journal article supplement (PMC2770707)
Supplement: NIHMS138104-supplement-1_si_001.pdf [file NIHMS138104-supplement-1_si_001.pdf]

## SUPPORTING INFORMATION

# Monitoring Simultaneous Distance and Orientation Changes in Discrete Dimers of DNA linked Gold Nanoparticles

*Hongyun Wang and Björn M. Reinhard\**

Department of Chemistry and The Photonics Center, Boston University, Boston, Massachusetts 02215

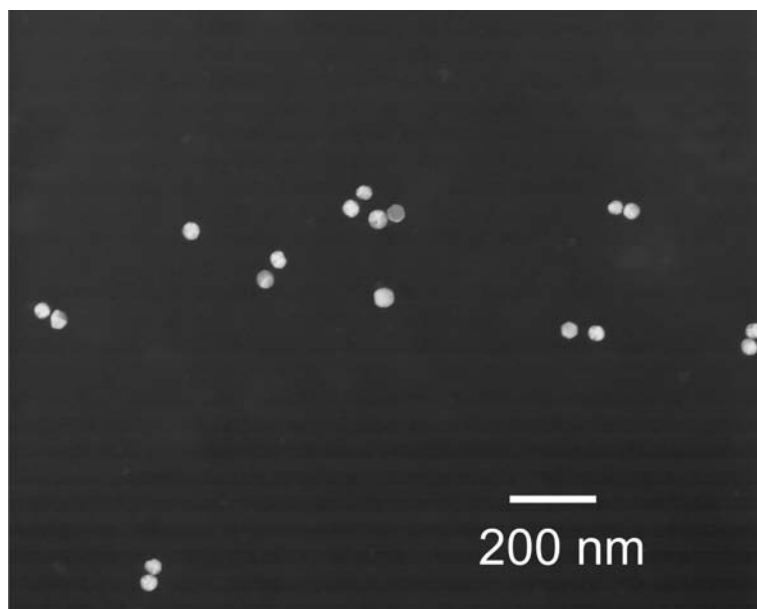

**Figure S1.** TEM micrograph of isolated dimers of DNA linked gold nanoparticles. The samples contained typically ~ 75% dimers, the remaining 25% were larger assemblies and monomers.

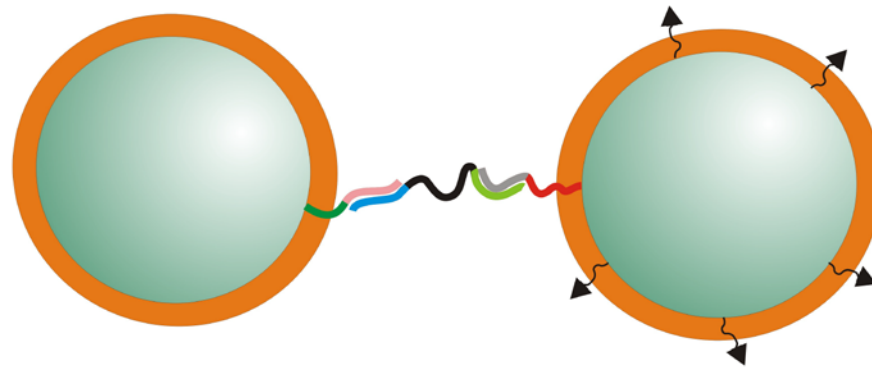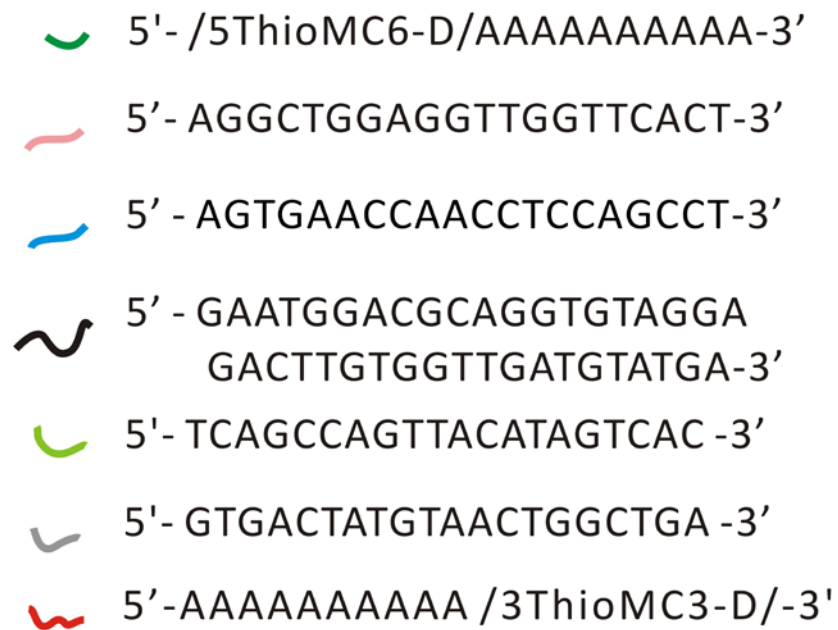

**Figure S2.** Schematic drawing of DNA linked dimers. The oligonucleotide sequences used for the DNA programmed dimer assembly are color-coded. The self-assembled PEG monolayers on the particle surface are indicated in orange.
